# Supplementary material for: Activating Hydrogen Evolution Reaction on Carbon Nanotube via Aryl Functionalisation: The Role of Hybrid sp2–sp3 Interface and Curvature
Source: MDPI journal article supplement (doi:10.3390/nano13142122), 2023-07-21

# **Supplementary Information: Activating Hydrogen Evolution Reaction on Carbon Nanotube via Aryl Functionalization: The Role of Hybrid $sp^2$ - $sp^3$ Interface and Curvature**

**Muhammad Ahmed<sup>1,2</sup>, Gurpreet Kour<sup>1,2</sup>, Ziqi Sun<sup>1,2</sup>, Aijun Du<sup>1,2,\*</sup>, and Xin Mao<sup>1,2,\*</sup>**

1 School of Chemistry and Physics, Faculty of Science, Queensland University of Technology, Gardens Point Campus, Brisbane, QLD-4001, Australia

2 QUT Centre for Materials Science, Queensland University of Technology, Gardens Point Campus, Brisbane, QLD-4001, Australia

\* Correspondence: aijun.du@qut.edu.au; Tel: +61 7 3138 6980

## Graphical representation of Gibbs Free Energy ( $\Delta G$ ) for 4,4 Armchair

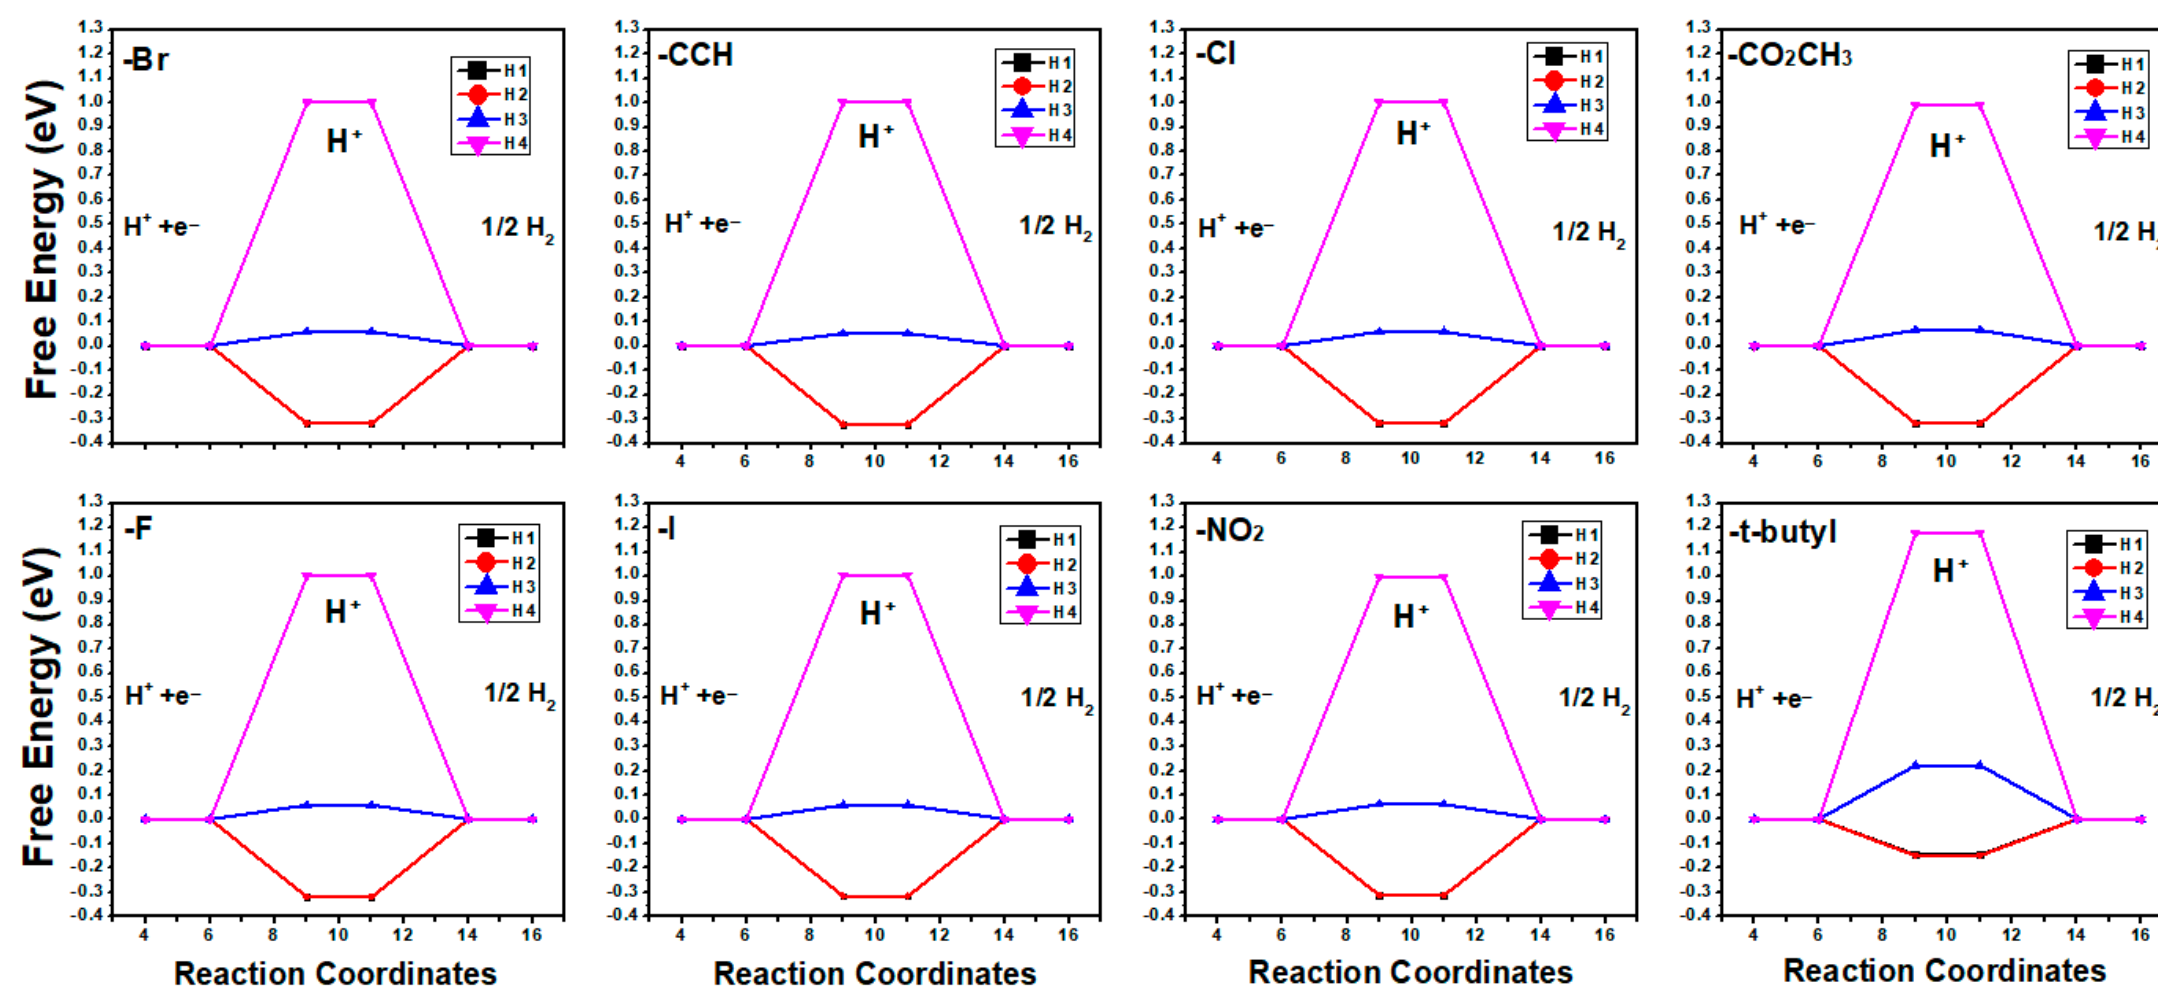

Figure S1. Graphical representation of Gibbs Free Energy ( $\Delta G$ ) for (4,4) armchair SWCNT

## Graphical representation of Gibbs Free Energy ( $\Delta G$ ) for 6,6 Armchair

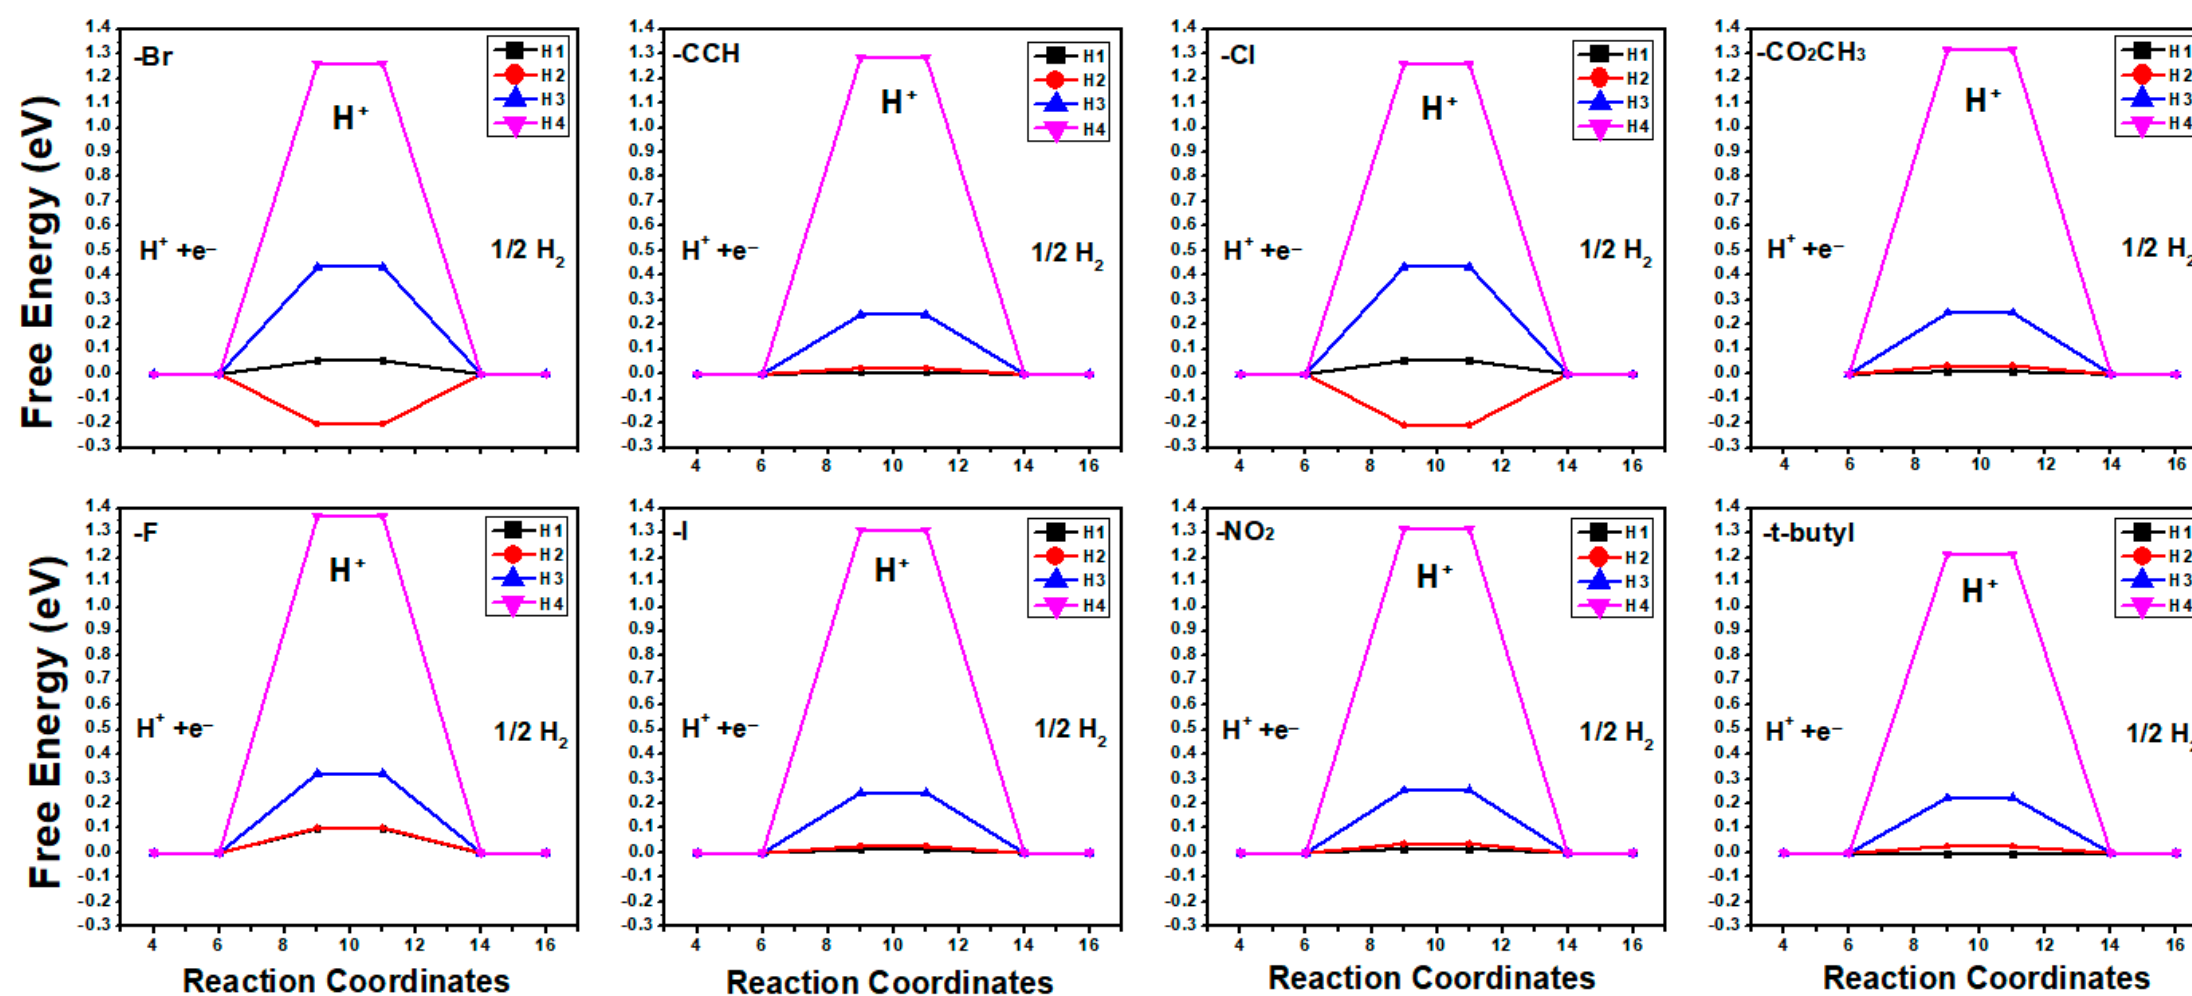

Figure S2. Graphical representation of Gibbs Free Energy ( $\Delta G$ ) for (6,6) armchair SWCNT.

### Graphical representation of Gibbs Free Energy ( $\Delta G$ ) for 8,8 Armchair

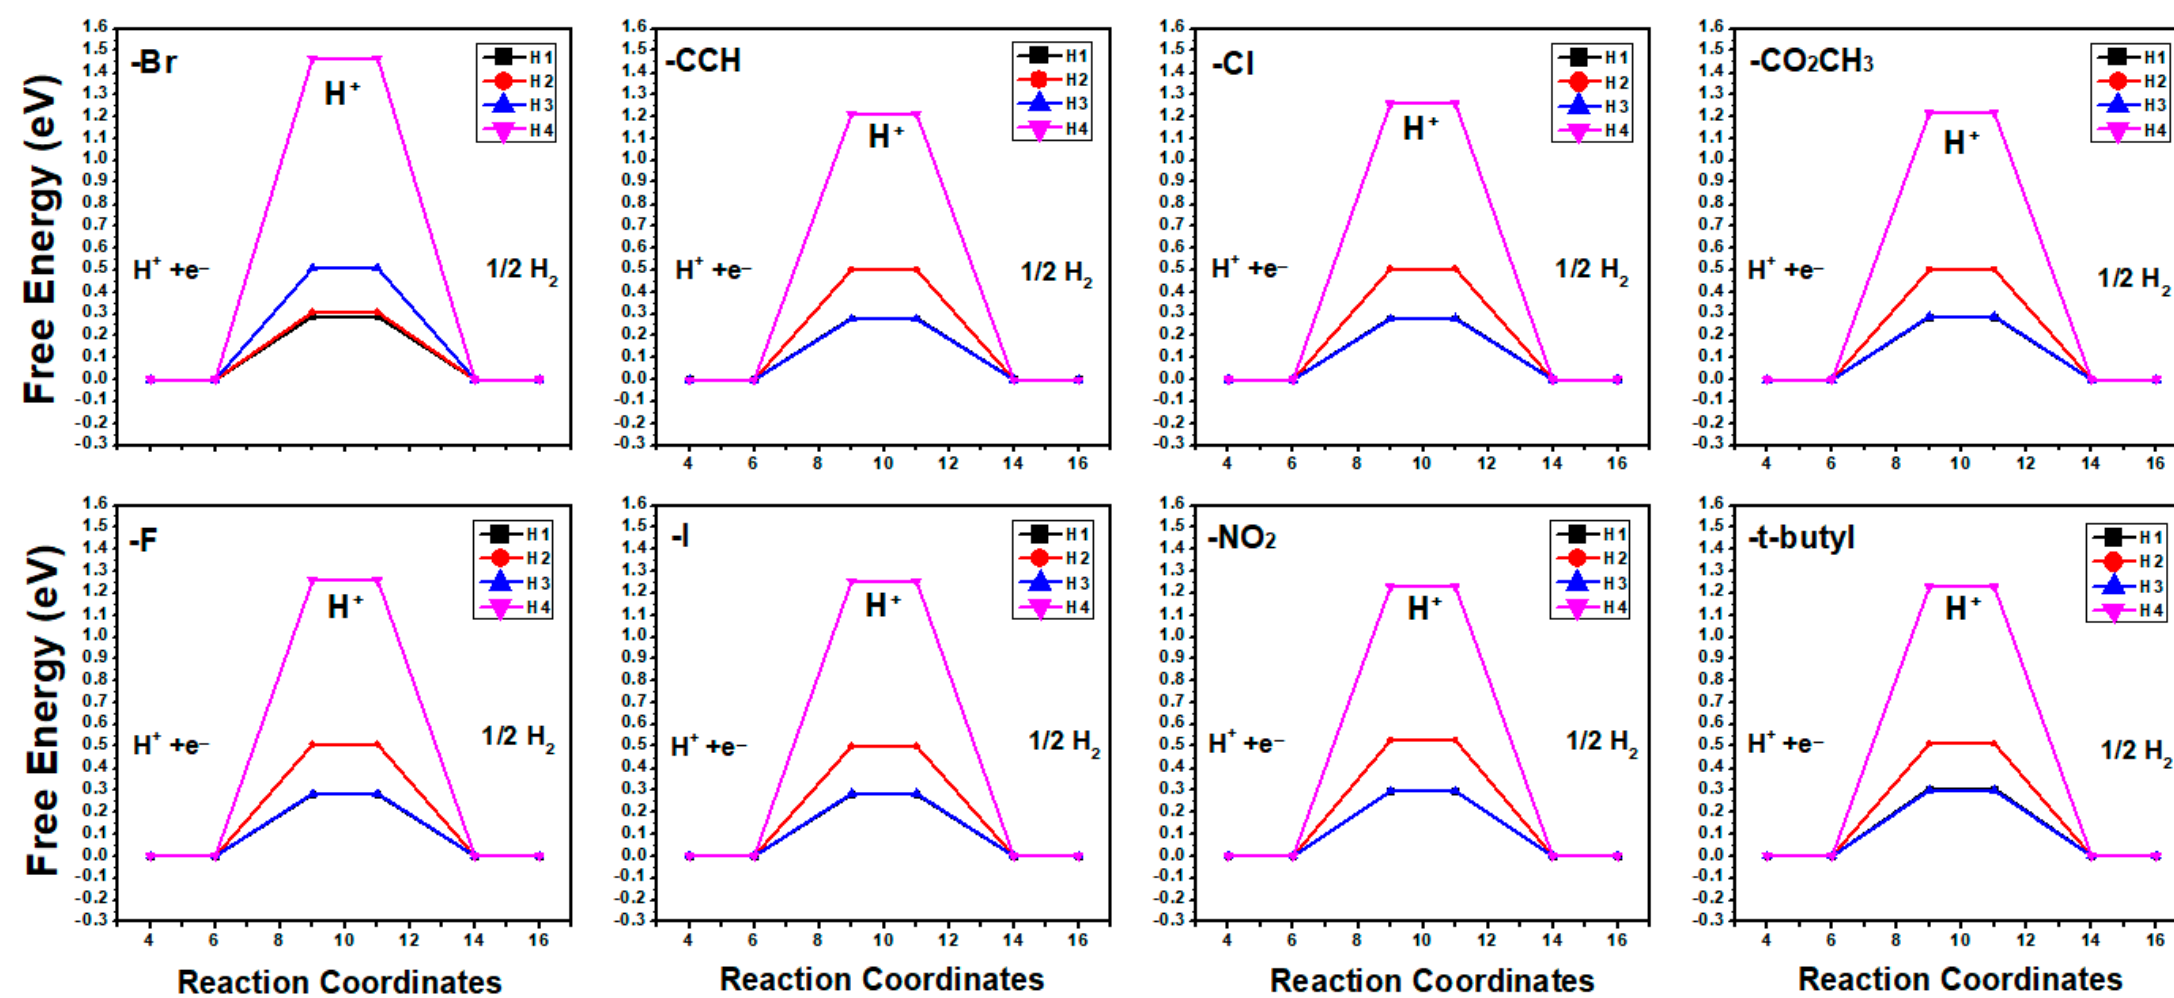

Figure S3. Graphical representation of Gibbs Free Energy ( $\Delta G$ ) for (8,8) armchair SWCNT.

Graphical representation of Gibbs Free Energy ( $\Delta G$ ) for 10,10 Armchair

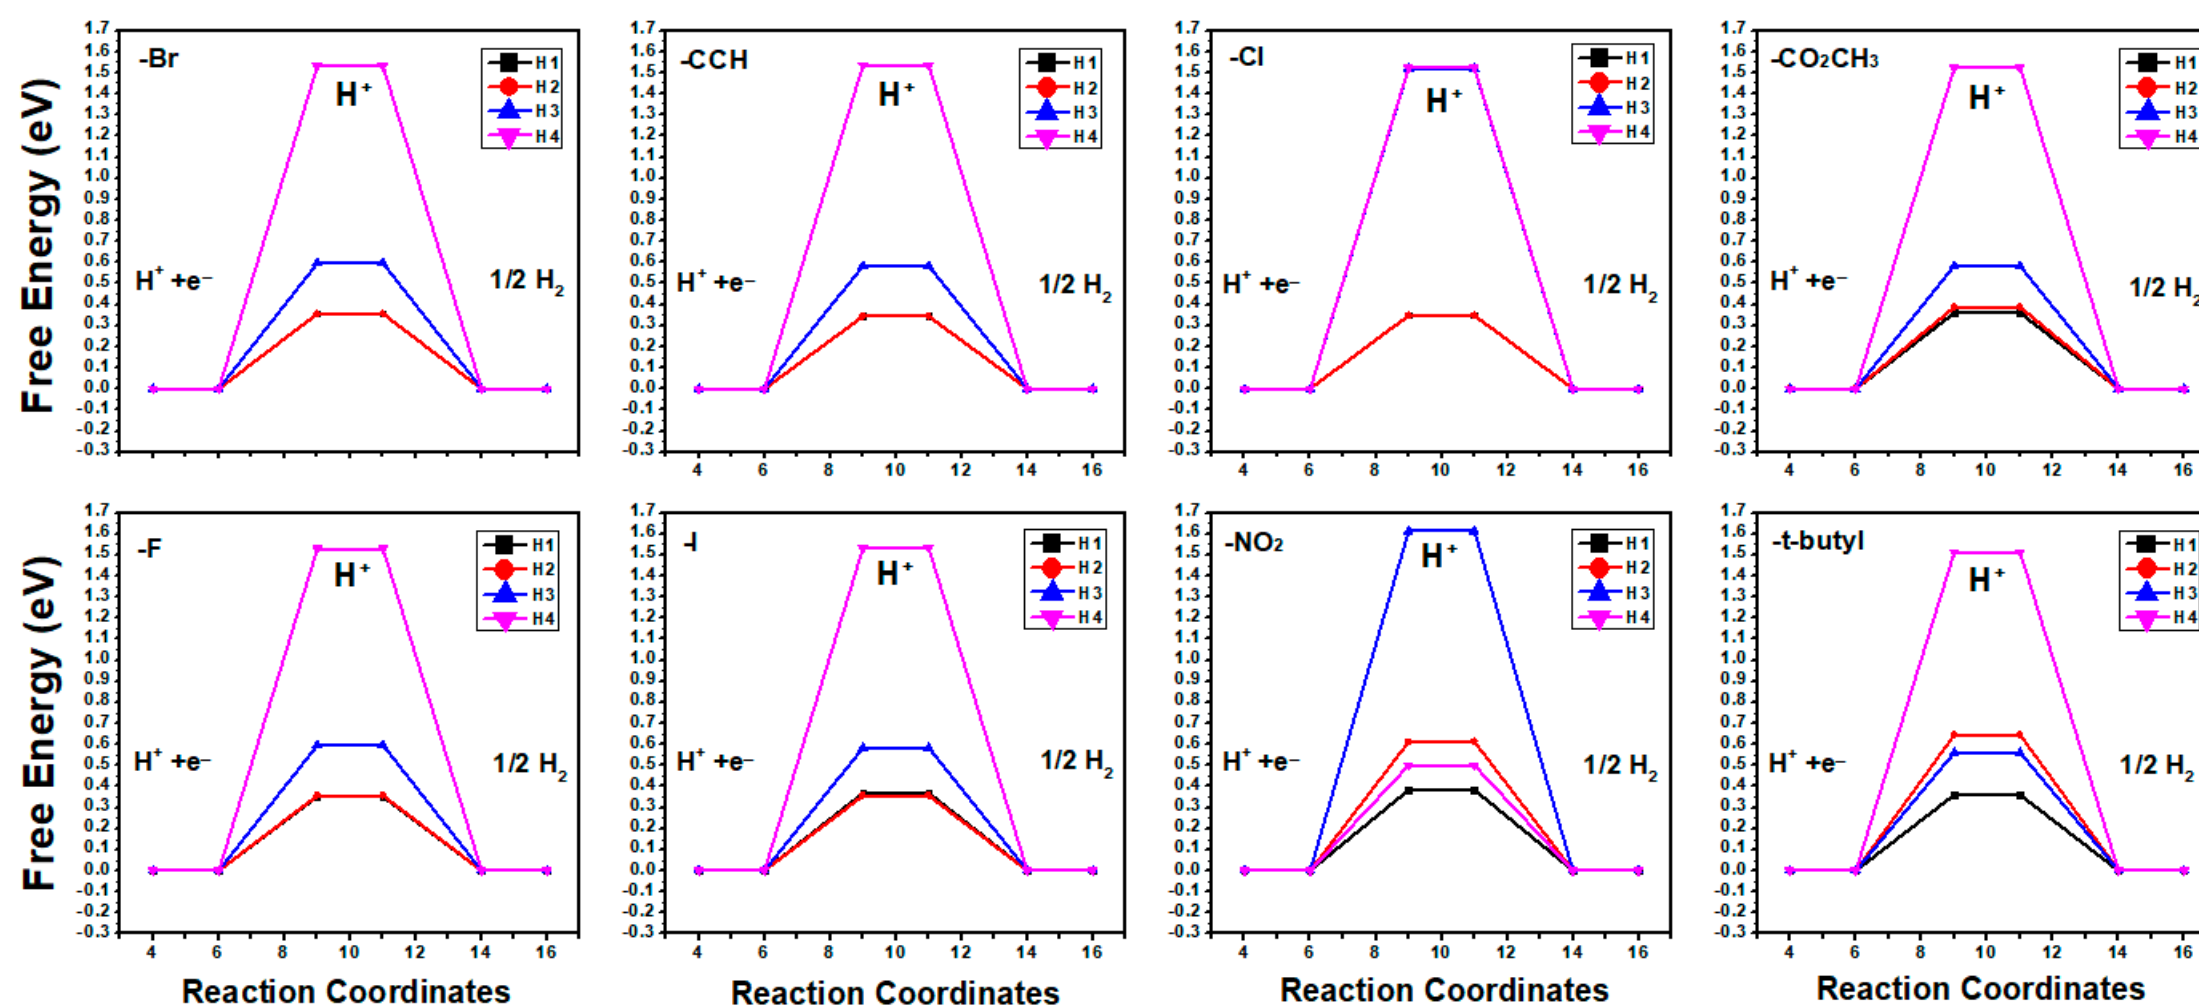

Figure S4. Graphical representation of Gibbs Free Energy ( $\Delta G$ ) for (10,10) armchair SWCNT.

Optimized geometrics for the various intermediates which are formed during the aryl functionalized single walled carbon nanotube

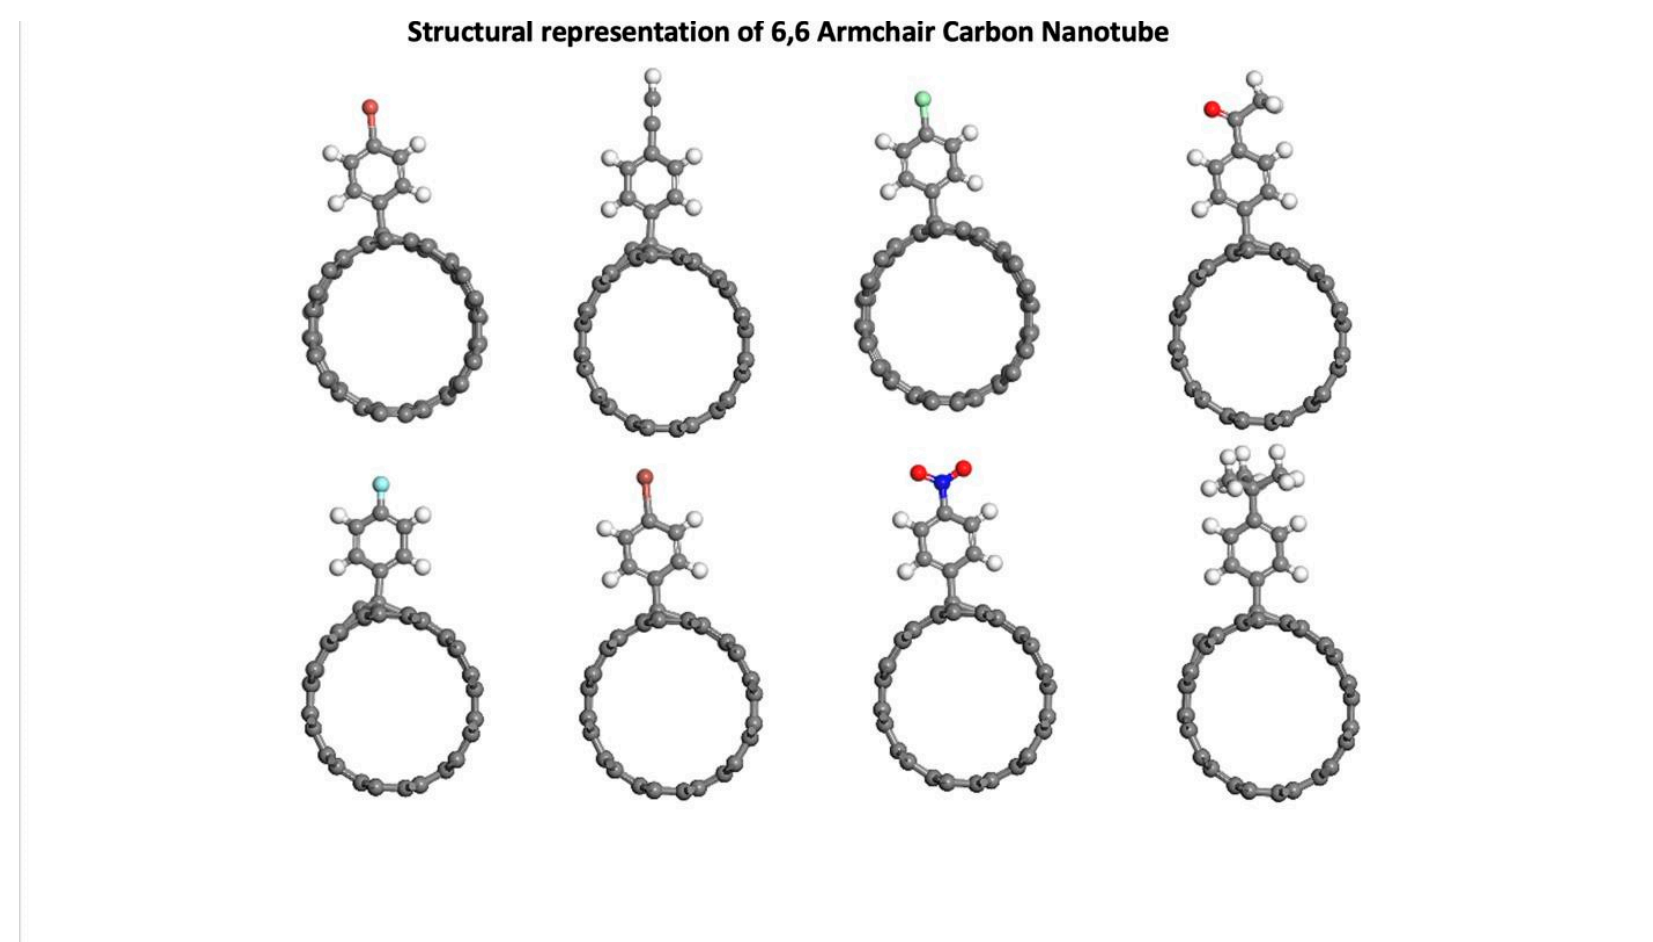

**Figure S5.** Structural representation of 6,6 armchair SWCNT.

Final optimized geometry of Aryl-CCH@SWCNT-4,4 Armchair

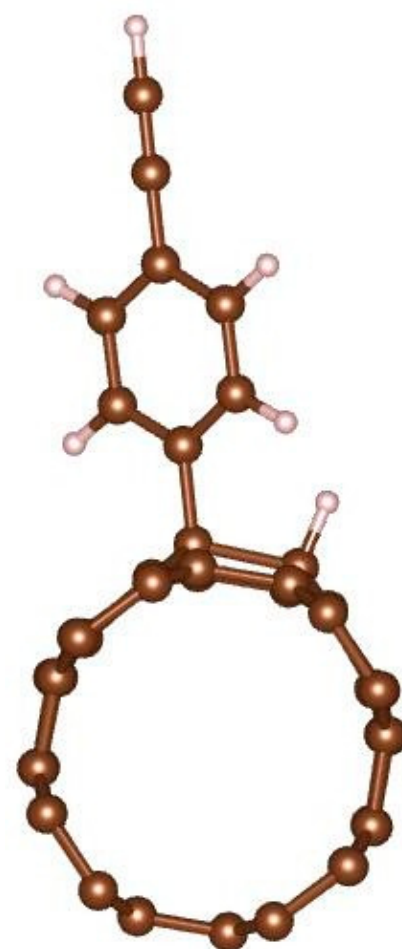

**Figure S6.** Final optimized geometry of Aryl-CCH@SWCNT-4,4 Armchair.

Final optimized geometry of Aryl-CCH@SWCNT-6,6 Armchair

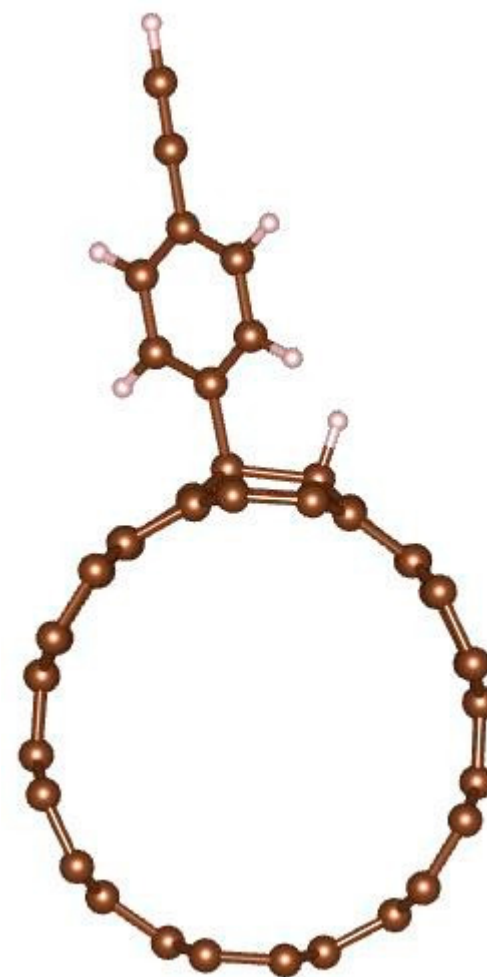

**Figure S7.** Final optimized geometry of Aryl-CCH@SWCNT-6,6 Armchair.



Final optimized geometry of Aryl-CCH@SWCNT-8,8 Armchair

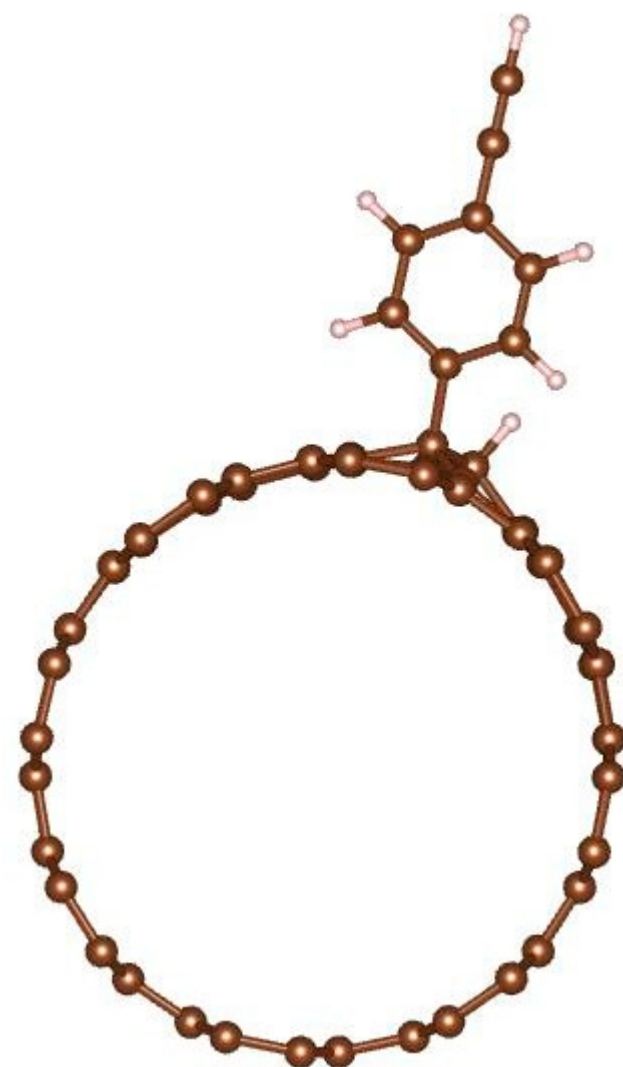

**Figure S8.** Final optimized geometry of Aryl-CCH@SWCNT-8,8 Armchair.

Final optimized geometry of Aryl-CCH@SWCNT-10,10 Armchair

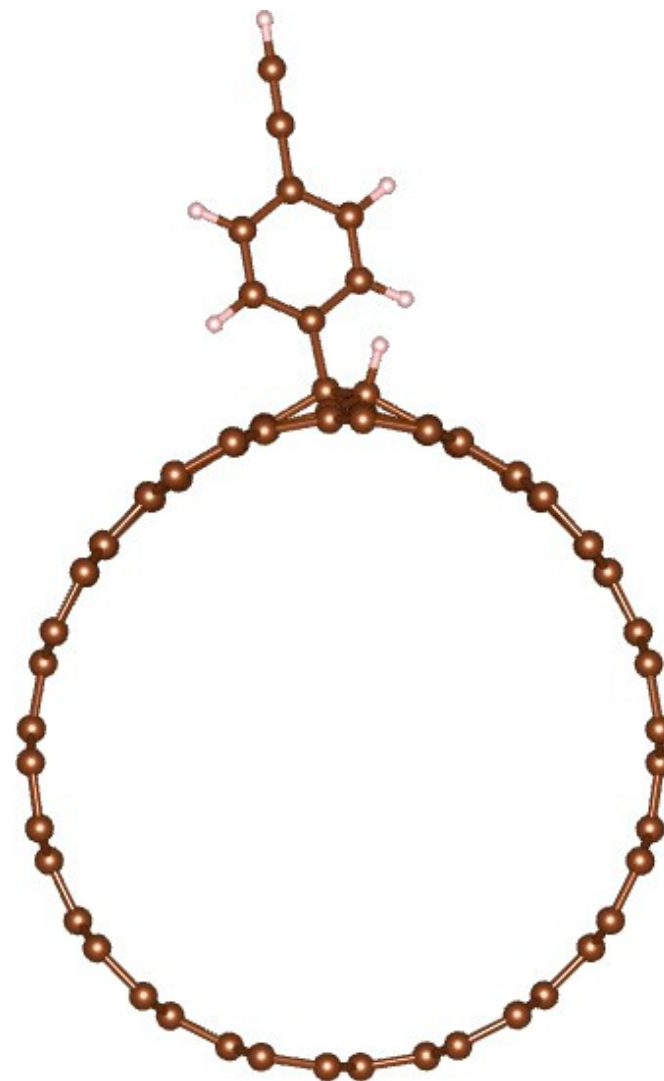

**Figure S9.** Final optimized geometry of Aryl-CCH@SWCNT-10,10 Armchair.

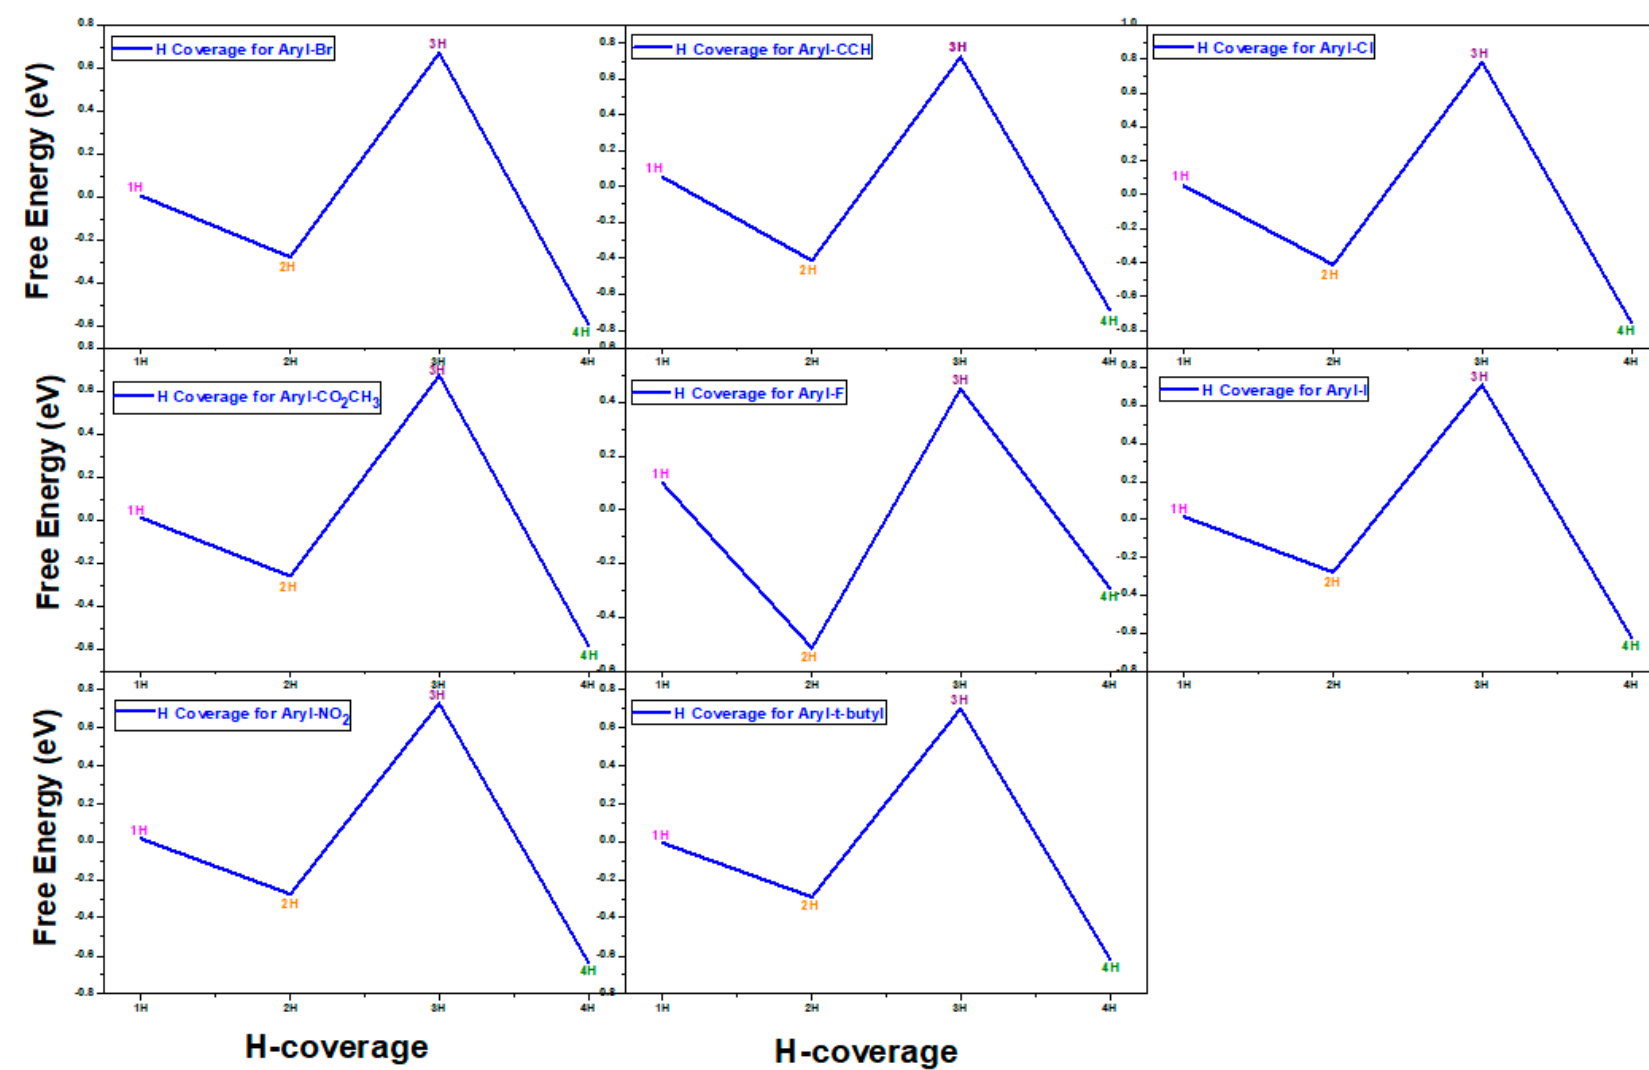

**Figure S10.** Influence of H coverage on the Aryl-SWCNT-6,6 armchair. H1, H2, H3, and H4 represent 1 H atom, 2 H atoms, 3 H atoms, and 4 H atoms respectively.

| Aryl                            | Charge | Bader charge  |
|---------------------------------|--------|---------------|
| Br                              | 0.907  | -0.092        |
| CCH                             | 0.934  | <b>-0.066</b> |
| Cl                              | 0.92   | -0.08         |
| CO <sub>2</sub> CH <sub>3</sub> | 0.89   | -0.107        |
| F                               | 0.90   | -0.092        |
| I                               | 0.89   | -0.105        |
| NO <sub>2</sub>                 | 0.897  | -0.102        |
| t-butyl                         | 0.91   | -0.09         |

**Table S1.** Bader charge analysis for Aryl-CCH@SWCNT taking 6,6 armchair nanotube.

| Aryl Functional Group           | Without solvation | Solvated Surface with Water Solvent (implicit) |
|---------------------------------|-------------------|------------------------------------------------|
| CCH                             | 0.005888 eV       | 0.011488 eV                                    |
| Cl                              | 0.053388 eV       | 0.047888 eV                                    |
| CO <sub>2</sub> CH <sub>3</sub> | 0.010988 eV       | -0.044112 eV                                   |
| F                               | 0.099488 eV       | 0.107388 eV                                    |
| NO <sub>2</sub>                 | 0.017188 eV       | 0.013888 eV                                    |
| t-butyl                         | -0.005812 eV      | -0.072712 eV                                   |

**Table S2.** Effect of the solvated surface with water solvent (implicit) on six of the newly discovered aryl catalysts.

4,4

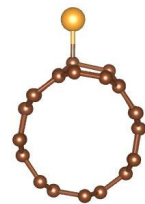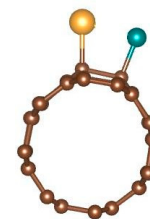

6,6

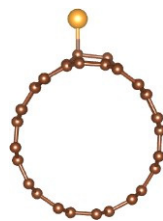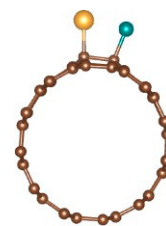

8,8

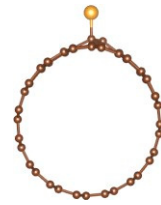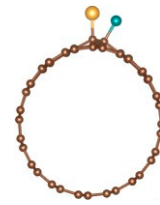



**10,10**

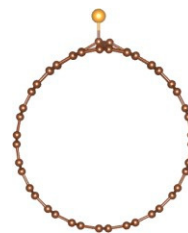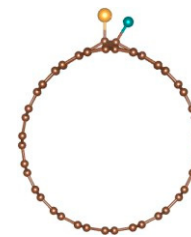

Supplement: s1 [file s1]
